# Supplementary material for: Clinical Ethics in Gabon: The Spectrum of Clinical Ethical Issues Based on Findings from In-Depth Interviews at Three Public Hospitals
Source: PubMed Central journal article supplement (PMC4498757; doi:10.1371/journal.pone.0132374), 2015-07-10
Supplement: pone.0132374.s002.pdf [file pone.0132374.s002.pdf]

**Interview Guideline**, Sippel D, Marckmann G, Ndzie-Atangana E, Strech D

**1 Introduction**

- Introduction of interviewer
- Short presentation of the project
- Explication of planed anonymized data usage

**2 Duty, function and working area of interviewee**

**3 Ethical and general issues in every day practice**

- General challenges in every day practice
- Understanding of “ethics” and “ethical issues”
- Ethical challenges in every day practice
- Ethical challenges in other areas of health care in Gabon

**4 Judging/assessing ethical issues**

- How the beforehand described issues or challenges influence every day work
- How ethical challenges are being dealt with
- Difficulties in dealing with those challenges

**5 Thoughts, suggestions, comments, wishes, fears**

- Concerning the project
- Concerning ethical issues related to the current situation of health care in Gabon

**6 Acknowledgement and farewell**
